# Supplementary material
Source: PubMed Central journal article supplement (PMC5976504)
Supplement: NIHMS922543-supplement-supplement_1.pdf [file NIHMS922543-supplement-supplement_1.pdf]

RISK FACTORS FOR ARDS FOLLOWING HEMORRHAGE

**TABLE E1 (electronic): Blood and fluid exposures by cohort**

|                                                        | <b>1:1:1<br/>(n=230)</b> | <b>1:1:2<br/>(n=224)</b> | <b>P=</b> |
|--------------------------------------------------------|--------------------------|--------------------------|-----------|
| Pre-randomized ratio of plasma to RBCs, first 24h      | 0 (0-0.7)                | 0 (0-0.5)                | 0.75      |
| During intervention ratio of plasma to RBCs, first 24h | 1 (0.8-1)                | 0.5 (0.4-0.5)            | <0.01*    |
| Post intervention ratio of plasma to RBCs, first 24h   | 0.7 (0-1)                | 1 (0.7-1.8)              | <0.01*    |
| Pre-randomized RBCs, first 24h                         | 2 (1-2)                  | 2 (1-2)                  | 0.12      |
| During intervention RBCs, first 24h                    | 6 (3-10)                 | 6.5 (4-12)               | <0.01*    |
| Post intervention RBCs, first 24h                      | 0 (0-2)                  | 0 (0-2)                  | 0.28      |
| Pre-randomized plasma, first 24h                       | 0 (0-1)                  | 0 (0-1)                  | 0.43      |
| During intervention plasma, first 24h                  | 5 (2-9)                  | 3 (2-6)                  | <0.01*    |
| Post intervention plasma, first 24h                    | 0 (0-2)                  | 2 (0-4)                  | <0.01*    |
| Pre-randomized platelets, first 24h                    | 0 (0-0)                  | 0 (0-0)                  | 0.16      |
| During intervention platelets, first 24h               | 6 (6-12)                 | 6 (0-6)                  | <0.01*    |
| Post intervention platelets, first 24h                 | 0 (0-6)                  | 0 (0-6)                  | <0.01*    |
| Pre-randomized IVFs, first 24h                         | 1.5 (0.4-2.8)            | 1.8 (0.5-3)              | 0.34      |
| During intervention IVFs, first 24h                    | 2 (0.7-3.3)              | 2 (0.8-3.4)              | 0.98      |
| Post intervention IVFs, first 24h                      | 3.4 (2.0-5.3)            | 3.6 (1.7-6.2)            | 0.34      |
| RBCs given, hours 0-6, units                           | 8 (5-13)                 | 9 (6-13.5)               | 0.05*     |
| RBCs given, hours 0-24, units                          | 9 (6-15)                 | 9 (7-16.5)               | 0.18      |
| Plasma given, hours 0-6, units                         | 6 (3-10)                 | 4 (3-8)                  | <0.01*    |
| Plasma given, hours 0-24, units                        | 7 (4-13)                 | 6 (3-10)                 | 0.01*     |
| Platelets given, hours 0-6, units                      | 6 (6-12)                 | 6 (0-6)                  | <0.01*    |
| Platelets given, hours 0-24, units                     | 12 (6-18)                | 6 (0-12)                 | <0.01*    |
| IVFs given, hours 0-6, liters                          | 4.1 (2-6.8)              | 4.9 (2.6-7.1)            | 0.19      |
| IVFs given, hours 0-24, liters                         | 7.5 (4.7-10.6)           | 8.1 (4.9-11.3)           | 0.28      |

Continuous values are presented as medians (interquartile range)

\*P ≤ 0.05

RBC, red blood cells; IVFs, intravenous fluids (sum of all crystalloid as mL unless otherwise stated)
